# Supplementary material for: The antiviral enzyme viperin inhibits cholesterol biosynthesis
Source: PubMed Central journal article supplement — J Biol Chem. 2021 May 23;297(1):100824. doi: 10.1016/j.jbc.2021.100824 (PMC8254119; doi:10.1016/j.jbc.2021.100824), 2021-05-23
Supplement: mmc1.pdf [file mmc1.pdf]

## SUPPORTING INFORMATION

### The antiviral enzyme viperin inhibits cholesterol biosynthesis

Timothy J. Grunkemeyer<sup>1</sup>, Soumi Ghosh<sup>1\*</sup>, Ayesha M. Patel<sup>1\*</sup>, Keerthi Sajja<sup>1\*</sup>, James Windak<sup>1</sup>, Venkatesha Basrur<sup>2</sup>, Youngsoo Kim<sup>1</sup>, Alexey I. Nesvizhskii<sup>2,3</sup>, Robert T. Kennedy<sup>1</sup>, E. Neil G. Marsh<sup>1,4‡</sup>

<sup>1</sup>Department of Chemistry, University of Michigan, Ann Arbor, MI 48109

<sup>2</sup>Department of Pathology, University of Michigan, Ann Arbor, MI 48109

<sup>3</sup>Department of Computational Medicine and Bioinformatics, University of Michigan, Ann Arbor, MI 48109

<sup>4</sup>Department of Biological Chemistry, University of Michigan, Ann Arbor, MI 48109

\*These authors contributed equally to this work.

Running title: *Viperin inhibits cholesterol biosynthesis*

‡ To whom the correspondence should be addressed:

Prof. Neil Marsh,  
Department of Chemistry,  
930 N. University Ave.  
Ann Arbor MI 48109-1055.  
[nmarsh@umich.edu](mailto:nmarsh@umich.edu)

**Table S1.** List of the top 100 proteins identified as candidates for the interactome of viperin. The data are sorted by SAINT score and then by fold enrichment over empty vector control. The percentage of the protein sequence covered and the number of unique peptides identified from each protein in the proteomics analysis are also given. Cholesterol biosynthetic enzymes are highlighted.

The full set of mass spectrometry proteomics data has been deposited to the ProteomeXchange Consortium via the PRIDE partner repository with the dataset identifier PXD023999.

| UniProt ID | Gene         | Description                                                                       | Enrichment (Fold change) | SAINT score | Percentage coverage | Number of unique peptides |
|------------|--------------|-----------------------------------------------------------------------------------|--------------------------|-------------|---------------------|---------------------------|
| Q8WXG1     | RSAD2        | Radical S-adenosyl methionine domain-containing protein 2                         | 417.64                   | 1           | 85.6                | 40                        |
| P48449     | <b>LSS</b>   | <b>Lanosterol synthase</b>                                                        | 32.96                    | 1           | 59.01               | 35                        |
| Q14534     | <b>SQLE</b>  | <b>Squalene monooxygenase</b>                                                     | 24.78                    | 1           | 53.5                | 23                        |
| Q6ZRQ5     | MMS22L       | Protein MMS22-like                                                                | 24.27                    | 1           | 23.4                | 27                        |
| Q6NUQ4     | TMEM214      | Transmembrane protein 214                                                         | 23.21                    | 1           | 45.3                | 26                        |
| Q9UHG3     | PCYOX1       | Prenylcysteine oxidase 1                                                          | 22.95                    | 1           | 46.3                | 17                        |
| O95470     | SGPL1        | Sphingosine-1-phosphate lyase 1                                                   | 21.32                    | 1           | 50                  | 23                        |
| P07099     | EPHX1        | Epoxide hydrolase 1                                                               | 20.01                    | 1           | 49.7                | 23                        |
| O94830     | DDHD2        | Phospholipase DDHD2                                                               | 19.62                    | 1           | 54.8                | 29                        |
| Q9H497     | TOR3A        | Torsin-3A                                                                         | 18.37                    | 1           | 59.2                | 18                        |
| Q9H6V9     | LDAH         | Isoform 2 of Lipid droplet-associated hydrolase                                   | 17.77                    | 1           | 52.3                | 18                        |
| Q96AD5     | PNPLA2       | Patatin-like phospholipase domain-containing protein 2                            | 15.76                    | 1           | 42.06               | 14                        |
| P23786     | CPT2         | Carnitine O-palmitoyltransferase 2, mitochondrial                                 | 15.49                    | 1           | 56.8                | 31                        |
| Q15738     | <b>NSDHL</b> | <b>Sterol-4-alpha-carboxylate 3-dehydrogenase, decarboxylating</b>                | 14.93                    | 1           | 67.3                | 19                        |
| Q9H3N1     | TMX1         | Thioredoxin-related transmembrane protein 1                                       | 14.11                    | 1           | 40                  | 14                        |
| Q9HDC9     | APMAP        | Adipocyte plasma membrane-associated protein                                      | 13.62                    | 1           | 54.8                | 20                        |
| Q96HA7     | TONSL        | Tonsoku-like protein                                                              | 13.55                    | 1           | 33.2                | 29                        |
| Q96BW9     | TAMM41       | CDP-diacylglycerol--glycerol-3-phosphate 3-phosphatidyltransferase, mitochondrial | 13.46                    | 1           | 52.5                | 15                        |
| O15270     | SPTLC2       | Serine palmitoyltransferase 2                                                     | 13.46                    | 1           | 33.8                | 15                        |
| Q32NB8     | PGS1         | Isoform 3 of Phosphatidate cytidyltransferase, mitochondrial                      | 13.44                    | 1           | 33.3                | 13                        |
| Q86UE4     | MTDH         | Protein LYRIC                                                                     | 13.33                    | 1           | 55.8                | 34                        |

|        |          |                                                           |       |   |      |    |
|--------|----------|-----------------------------------------------------------|-------|---|------|----|
| Q8WTS1 | ABHD5    | 1-acylglycerol-3-phosphate O-acyltransferase ABHD5        | 13.14 | 1 | 58.2 | 11 |
| Q8NBM8 | PCYOX1L  | Prenylcysteine oxidase-like                               | 12.95 | 1 | 31.4 | 14 |
| O43156 | TTI1     | TELO2-interacting protein 1 homolog                       | 12.36 | 1 | 24.0 | 19 |
| Q13505 | MTX1     | Metaxin-1                                                 | 12.15 | 1 | 26.0 | 11 |
| Q8N128 | FAM177A1 | Isoform 2 of Protein FAM177A1                             | 12.14 | 1 | 44.1 | 10 |
| O15228 | GNPAT    | Dihydroxyacetone phosphate acyltransferase                | 12.06 | 1 | 60.7 | 36 |
| Q8IZ81 | ELMOD2   | ELMO domain-containing protein 2                          | 11.5  | 1 | 32.8 | 11 |
| Q8NBX0 | SCCPDH   | Saccharopine dehydrogenase-like oxidoreductase            | 10.5  | 1 | 39.9 | 11 |
| Q16850 | CYP51A1  | lanosterol 14-alpha demethylase                           | 10.18 | 1 | 27.2 | 11 |
| Q9UH92 | MLX      | MAX-like protein X                                        | 10.17 | 1 | 43.3 | 2  |
| P33121 | ACSL1    | Long-chain-fatty-acid--CoA ligase 1                       | 10.02 | 1 | 50.1 | 31 |
| Q9BSY9 | DESI2    | Desumoylating isopeptidase 2                              | 9.85  | 1 | 62.9 | 6  |
| P56937 | HSD17B7  | 3-keto-steroid reductase                                  | 9.84  | 1 | 32.6 | 10 |
| P42345 | MTOR     | Serine/threonine-protein kinase mTOR                      | 9.76  | 1 | 41.7 | 83 |
| O15269 | SPTLC1   | Serine palmitoyltransferase 1                             | 9.53  | 1 | 29.2 | 12 |
| Q9HBH5 | RDH14    | Retinol dehydrogenase 14                                  | 9.52  | 1 | 36.3 | 10 |
| Q9BV23 | ABHD6    | Monoacylglycerol lipase ABHD6                             | 9.2   | 1 | 27.3 | 9  |
| Q99487 | PAFAH2   | Platelet-activating factor acetylhydrolase 2, cytoplasmic | 9.2   | 1 | 39.3 | 12 |
| Q96KC8 | DNAJC1   | DnaJ homolog subfamily C member 1                         | 9.2   | 1 | 27.3 | 12 |
| Q96E22 | NUS1     | Dehydrodolichyl diphosphate synthase complex subunit nus1 | 8.87  | 1 | 46.1 | 10 |
| Q8TC12 | RDH11    | Retinol dehydrogenase 11                                  | 8.65  | 1 | 40.3 | 12 |
| Q8NBQ5 | HSD17B11 | Estradiol 17-beta-dehydrogenase 11                        | 8.65  | 1 | 42.3 | 12 |
| P50336 | PPOX     | Protoporphyrinogen oxidase                                | 8.61  | 1 | 39.8 | 14 |
| Q9UIA9 | XPO7     | Exportin-7                                                | 8.12  | 1 | 42.3 | 36 |
| P21964 | COMT     | Catechol O-methyltransferase                              | 8.04  | 1 | 51.7 | 10 |
| Q9UI26 | IPO11    | Isoform 2 of Importin-11                                  | 7.69  | 1 | 36.3 | 28 |
| P51648 | ALDH3A2  | Aldehyde dehydrogenase family 3 member A2                 | 6.9   | 1 | 32.9 | 13 |
| Q9NW68 | BSDC1    | BSD domain-containing protein 1                           | 6.89  | 1 | 37.9 | 13 |

|        |          |                                                                         |      |      |      |    |
|--------|----------|-------------------------------------------------------------------------|------|------|------|----|
| P40855 | PEX19    | Peroxisomal biogenesis factor 19                                        | 6.87 | 1    | 75.6 | 16 |
| P47712 | PLA2G4A  | Cytosolic phospholipase A2                                              | 6.62 | 1    | 43.5 | 26 |
| O43681 | ASNA1    | ATPase ASNA1                                                            | 6    | 1    | 61.2 | 16 |
| Q9BXW9 | FANCD2   | Isoform 1 of Fanconi anemia group D2 protein                            | 5.91 | 1    | 44.8 | 50 |
| O60313 | OPA1     | Isoform 2 of Dynamin-like 120 kDa protein, mitochondrial                | 5.88 | 1    | 59.5 | 60 |
| Q13724 | MOGS     | Mannosyl-oligosaccharide glucosidase                                    | 5.83 | 1    | 38.4 | 24 |
| O76071 | CIAO1    | Probable cytosolic iron-sulfur protein assembly protein Ciao1           | 5.66 | 1    | 57.8 | 14 |
| Q9Y4R8 | TELO2    | Telomere length regulation protein TEL2 homolog                         | 4.86 | 1    | 48.5 | 32 |
| Q96T76 | MMS19    | Isoform 5 of MMS19 nucleotide excision repair protein homolog           | 4.61 | 1    | 63.7 | 50 |
| P40939 | HADHA    | Trifunctional enzyme subunit alpha, mitochondrial                       | 3.97 | 1    | 59.0 | 35 |
| Q6NXR4 | TTI2     | TELO2-interacting protein 2                                             | 8.86 | 0.99 | 27.8 | 11 |
| Q86SQ9 | DHDDS    | Isoform 2 of Dehydrodolichyl diphosphate synthase complex subunit DHDDS | 8.53 | 0.99 | 36.2 | 10 |
| Q99653 | CHP1     | Calcineurin B homologous protein 1                                      | 8.53 | 0.99 | 67.2 | 10 |
| Q92575 | UBXN4    | UBX domain-containing protein 4                                         | 8.21 | 0.99 | 25.0 | 7  |
| P50897 | PPT1     | Palmitoyl-protein thioesterase 1                                        | 7.71 | 0.99 | 45.1 | 9  |
| Q13190 | STX5     | Syntaxin-5                                                              | 7.11 | 0.99 | 40.0 | 12 |
| Q53GQ0 | HSD17B12 | Very-long-chain 3-oxoacyl-CoA reductase                                 | 6.68 | 0.99 | 32.7 | 9  |
| P00387 | CYB5R3   | Isoform 3 of NADH-cytochrome b5 reductase 3                             | 5.42 | 0.99 | 36.8 | 10 |
| O95573 | ACSL3    | Long-chain-fatty-acid--CoA ligase 3                                     | 4.77 | 0.99 | 42.9 | 20 |
| P55084 | HADHB    | Trifunctional enzyme subunit beta, mitochondrial                        | 4.1  | 0.99 | 63.5 | 26 |
| Q99807 | COQ7     | 5-demethoxyubiquinone hydroxylase, mitochondrial                        | 7.56 | 0.98 | 31.3 | 6  |
| Q9H1E5 | TMX4     | Thioredoxin-related transmembrane protein 4                             | 7.55 | 0.98 | 28.1 | 8  |
| Q9BRX8 | FAM213A  | Redox-regulatory protein FAM213A                                        | 7.55 | 0.98 | 35.8 | 8  |

|        |              |                                                              |      |      |      |    |
|--------|--------------|--------------------------------------------------------------|------|------|------|----|
| Q6PIU2 | NCEH1        | Isoform 2 of Neutral cholesterol ester hydrolase 1           | 7.22 | 0.98 | 25.7 | 9  |
| Q9HAP2 | MLXIP        | MLX-interacting protein                                      | 5.92 | 0.98 | 21.9 | 11 |
| P43378 | PTPN9        | Tyrosine-protein phosphatase non-receptor type 9             | 5.71 | 0.98 | 26.3 | 13 |
| O75155 | CAND2        | Cullin-associated NEDD8-dissociated protein 2                | 5.03 | 0.98 | 23.0 | 16 |
| Q86U38 | NOP9         | Nucleolar protein 9                                          | 3.63 | 0.98 | 43.7 | 21 |
| Q9H1A3 | METTL9       | Methyltransferase-like protein 9                             | 7.22 | 0.97 | 31.8 | 8  |
| P37268 | <b>FDFT1</b> | <b>Squalene synthase</b>                                     | 5.45 | 0.97 | 40.0 | 14 |
| Q9Y2Z9 | COQ6         | Ubiquinone biosynthesis monooxygenase COQ6, mitochondrial    | 6.9  | 0.96 | 26.3 | 9  |
| Q6PI48 | DARS2        | Aspartate--tRNA ligase, mitochondrial                        | 3.93 | 0.96 | 43.9 | 21 |
| Q96AG4 | LRRC59       | Leucine-rich repeat-containing protein 59                    | 3.77 | 0.96 | 47.9 | 13 |
| Q8WVC6 | DCAKD        | Dephospho-CoA kinase domain-containing protein               | 7.23 | 0.95 | 35.1 | 7  |
| Q3SXM5 | HSDL1        | Inactive hydroxysteroid dehydrogenase-like protein 1         | 6.25 | 0.95 | 32.4 | 9  |
| O14656 | TOR1A        | Torsin-1A                                                    | 4.51 | 0.95 | 42.2 | 13 |
| O75915 | ARL6IP5      | PRA1 family protein 3                                        | 6.25 | 0.94 | 20.2 | 4  |
| Q9Y673 | ALG5         | Dolichyl-phosphate beta-glucosyltransferase                  | 5.92 | 0.94 | 17.6 | 5  |
| Q6UX53 | METTL7B      | Methyltransferase-like protein 7B                            | 5.59 | 0.94 | 27.5 | 6  |
| O75691 | UTP20        | Small subunit processome component 20 homolog                | 5.31 | 0.94 | 9.6  | 24 |
| Q13637 | RAB32        | Ras-related protein Rab-32                                   | 3.94 | 0.93 | 40.0 | 8  |
| A6NDU8 | C5ORF51      | UPF0600 protein C5orf51                                      | 3.49 | 0.93 | 37.8 | 10 |
| Q99541 | PLIN2        | Perilipin-2                                                  | 3.37 | 0.93 | 63.6 | 21 |
| P02649 | APOE         | Apolipoprotein E                                             | 6.91 | 0.92 | 35.3 | 10 |
| P53701 | HCCS         | Cytochrome c-type heme lyase                                 | 5.26 | 0.92 | 37.3 | 8  |
| P01111 | NRAS         | GTPase NRas                                                  | 4.72 | 0.92 | 58.2 | 8  |
| A1L0T0 | ILVBL        | Acetolactate synthase-like protein                           | 5.59 | 0.91 | 24.5 | 8  |
| Q2TAA5 | ALG11        | GDP-Man:Man(3)GlcNAc(2)-PP-Dol alpha-1,2-mannosyltransferase | 5.26 | 0.91 | 23.6 | 7  |
| Q96CS3 | FAF2         | FAS-associated factor 2                                      | 3.85 | 0.91 | 38.4 | 12 |
| Q68D91 | MBLAC2       | Metallo-beta-lactamase domain-containing protein 2           | 6.89 | 0.9  | 28.3 | 7  |
| Q9NP73 | ALG13        | Putative bifunctional UDP-N-acetylglucosamine                | 5.58 | 0.9  | 44.8 | 1  |

|        |        |                                                                         |      |     |      |    |
|--------|--------|-------------------------------------------------------------------------|------|-----|------|----|
|        |        | transferase and deubiquitinase                                          |      |     |      |    |
| P04843 | RPN1   | Dolichyl-diphosphooligosaccharide-protein glycosyltransferase subunit 1 | 4.45 | 0.9 | 26.7 | 13 |
| P05023 | ATP1A1 | Sodium/potassium-transporting ATPase subunit alpha-1                    | 4.33 | 0.9 | 17.2 | 12 |

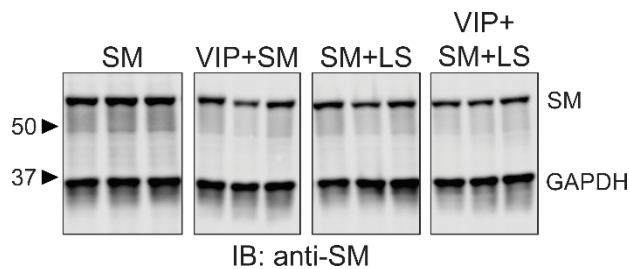

Figure S1. Representative western blots used in quantification of relative SM concentrations for SM activity assays. Each lane is one biological replicate. 'SM only' cells were co-transfected with empty vector as a control.

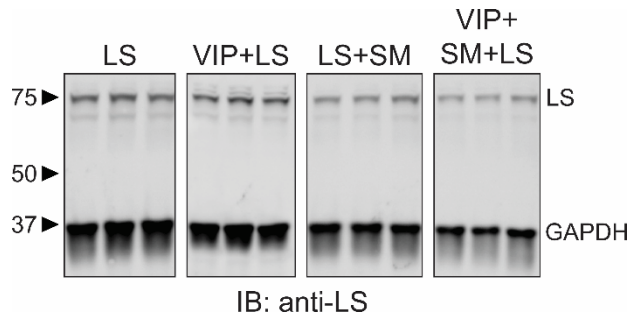

Figure S2. Representative western blots used in quantification of relative LS concentrations for LS activity assays. Each lane is one biological replicate. 'LS only' cells were co-transfected with empty vector as a control.

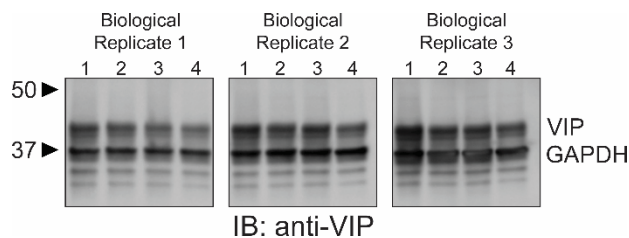

Figure S3. Western blots used in quantification of VIP concentrations for radical-SAM assays. 1: VIP; 2: VIP+LS; 3: VIP+SM; 4: VIP+LS+SM. Each panel is a single biological replicate.
